# Supplementary material
Source: PubMed Central journal article supplement (PMC1456869)

Supplemental Figure 1. Design of, and additional phenotypes induced by miR165bm6.

A

*PHB* 5' **UU**GGGAUGAAGCCUGGUCCGG 3'  
*REV* 5' **CU**GGGAUGAAGCCUGGUCCGG 3'  
*ATHB8* 5' **CU**GGGAUGAAGCCUGGUCCGG 3'  
*CNR* 5' **CU**GG**A**UGAAGCCUGGUCCGG 3'  
*PHV* 5' **UU**GGGAUGAAGCCUGGUCCGG 3'  
*phv-1d* 5' **UU**GGGAUGAAGCCUG**A**UCCGG 3'  
*miR165b* 3' CCCCCUACUUCGGACCAGGCU 5'  
*miR165bm6* 3' CCCCCUACUUCGGAC**U**AGGCU 5'

B

pre miR165b

```

5'
U| A-- U UC-- U A UU A G AAAC ACAC UU U A GA
GA GAGGC AUU UGUUG GGGG AUG GUUUGG UCGA GAUAUCAU GCAU AUGU AUAUGU AUG UGCAUUAU \
CU UUCCG UAA ACAAC CCCC UAC CGGACC GGCU CUAUGGUA CGUA UACA UAUUAU UAC AUGUAAUGUA C
A^ AAC U UUGU U C UU A G CAC- CA-- -- - - GU
    
```

C

pre miR165bm6

```

5'
U| A-- U UC-- U A UU A G AAAC ACAC UU U A GA
GA GAGGC AUU UGUUG GGGG AUG GUUUGA UCGA GAUAUCAU GCAU AUGU AUAUGU AUG UGCAUUAU \
CU UUCCG UAA ACAAC CCCC UAC CGGACU GGCU CUAUGGUA CGUA UACA UAUUAU UAC AUGUAAUGUA C
A^ AAC U UUGU U C UU A G CAC- CA-- -- - - GU
3'
    
```

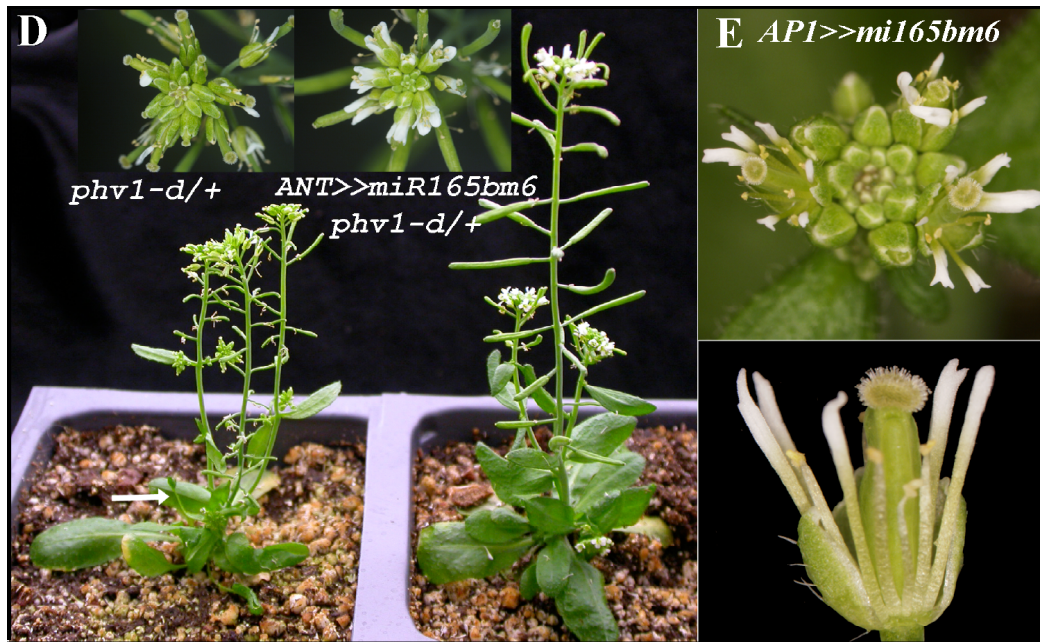

Supplement: plntcell_tpc.105.040725_1.pdf [file plntcell_tpc.105.040725_1.pdf]
